# Supplementary material
Source: publisher figshare collection journal article supplement (https://springernature.figshare.com/ndownloader/files/31577438)
Supplement: Supplementary file [file 31577438]

## Additional file 15

Correlations between commonly used ICU parameters and sonographic values

|                                                                    |                                                             |                        |                             |
|--------------------------------------------------------------------|-------------------------------------------------------------|------------------------|-----------------------------|
| SAPS II predicting new sonographic pathologies                     | R = 0.401                                                   | R <sup>2</sup> = 0.160 | adj. R <sup>2</sup> = 0.152 |
|                                                                    | New pathologies = 1.806 + (0.125·SAPS II)                   |                        |                             |
| SAPS II predicting value scale score                               | R = 0.207                                                   | R <sup>2</sup> = 0.043 | adj. R <sup>2</sup> = 0.032 |
|                                                                    | Value scale score = 4.492 + (0.0424·SAPS II)                |                        |                             |
| SAPS II predicting likelihood of changes to therapy                | R = 0.152                                                   | R <sup>2</sup> = 0.023 | adj. R <sup>2</sup> = 0.012 |
|                                                                    | Therapy changes = 0.231 + (0.00593·SAPS II)                 |                        |                             |
| Days in intensive care predicting new sonographic pathologies      | R = 0.248                                                   | R <sup>2</sup> = 0.062 | adj. R <sup>2</sup> = 0.053 |
|                                                                    | New pathologies = 5.594 + (0.128·days in intensive care)    |                        |                             |
| Days in intensive care predicting value scale score                | R = 0.148                                                   | R <sup>2</sup> = 0.022 | adj. R <sup>2</sup> = 0.012 |
|                                                                    | Value scale score = 5.466 + (0.0896·days in intensive care) |                        |                             |
| Days in intensive care predicting likelihood of changes to therapy | R = 0.116                                                   | R <sup>2</sup> = 0.014 | adj. R <sup>2</sup> = 0.004 |
|                                                                    | Therapy changes = 0.422 + (0.00723·days in intensive care)  |                        |                             |
| Age predicting new sonographic pathologies                         | R = 0.086                                                   | R <sup>2</sup> = 0.007 | adj. R <sup>2</sup> = 0.000 |
|                                                                    | New pathologies = 4.527 + (0.0276·age)                      |                        |                             |

R: correlation coefficient; R<sup>2</sup>: coefficient of determination; adj. R<sup>2</sup>: adjusted R-squared value;

SAPS II: Simplified Acute Physiology Score.
